# Supplementary material for: CoMix: comparing mixing patterns in the Belgian population during and after lockdown
Source: bioRxiv or medRxiv preprint supplement (doi:10.1101/2020.08.06.20169763), 2020-10-26
Supplement: Supplementary file [file 2020.08.06.20169763-1.pdf]

# ADDITIONAL MATERIAL FOR CoMix: comparing mixing patterns in the Belgian population during and after lockdown

Pietro Coletti<sup>1\*</sup>, James Wambua<sup>1</sup>, Amy Gimma<sup>2</sup>,  
Lander Willem<sup>3</sup> Sarah Vercruysse<sup>1</sup>, Bieke Vanhoutte<sup>3</sup>,  
Christofer I Jarvis<sup>2</sup>, Kevin Van Zandvoort<sup>2</sup>, John Edmunds<sup>2</sup>,  
Philippe Beutels<sup>3,4</sup>, Niel Hens<sup>1,3</sup>  
on behalf of the SIMID-COVID19 Team

August 6, 2020

<sup>1</sup>Data Science Institute, I-BioStat, UHasselt, Hasselt, Belgium. <sup>2</sup>London School of Hygiene and Tropical Medicine, London, UK <sup>3</sup>Centre for Health Economic Research and Modelling Infectious Diseases, Vaccine & Infectious Disease Institute, University of Antwerp, Antwerp, Belgium. <sup>4</sup>School of Public Health and Community Medicine, The University of New South Wales, Sydney, Australia.

\* Corresponding author: [pietro.coletti@uhasselt.be](mailto:pietro.coletti@uhasselt.be)

# 1 Supporting information

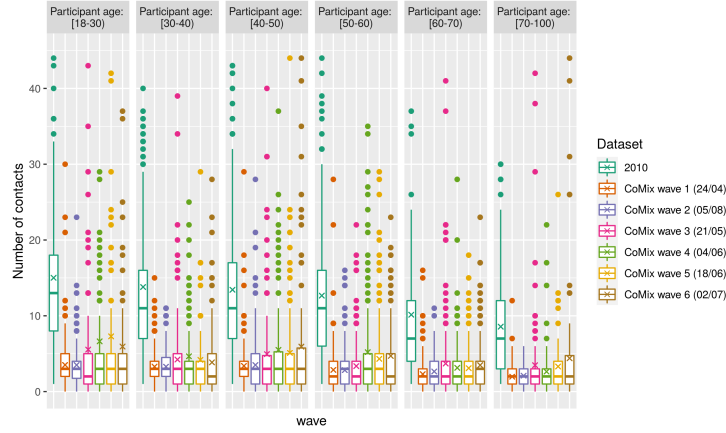

Figure 1: **Number of contacts.** Boxplot of the number of contacts. The boxplot marks the interquartile range (IQR), The horizontal line marks the median value and the 'x' symbol marks the average. Whiskers extend up to 1.5 times IQR and outliers shown as point.

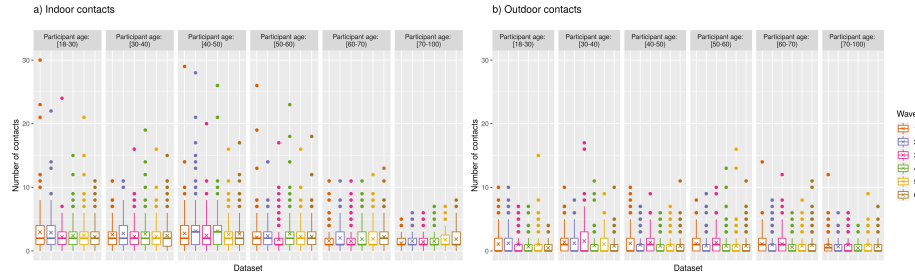

Figure 2: **Indoor/outdoor contacts (a): Indoor contacts.(b): Outdoor contacts.** In both panels, the boxplot shows the interquartile range (IQR), The horizontal line marks the median value and the 'x' symbol marks the average. Whiskers extend up to 1.5 times IQR and outliers shown as point.

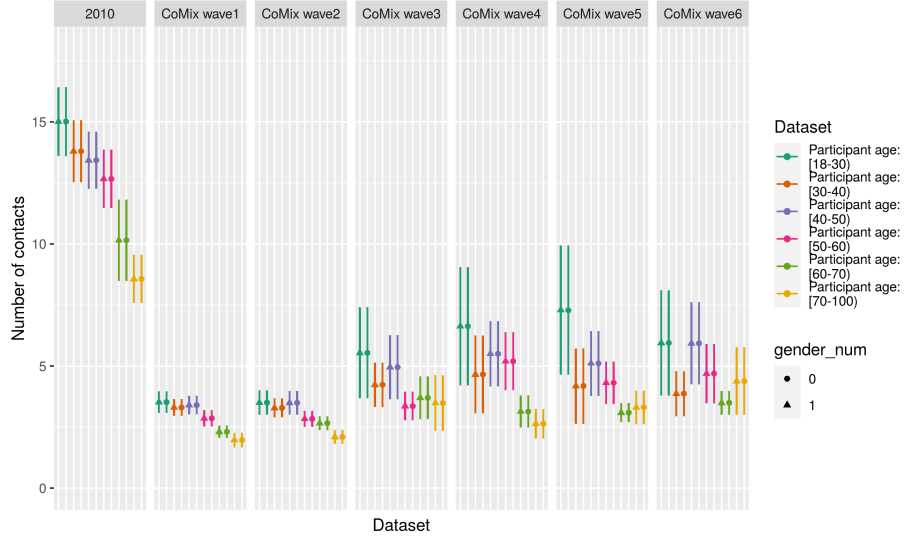

Figure 3: **Average number of contacts broken down by gender and age.** Mean number of contacts broken down by gender and age. Errorbars mark the 95% CI.

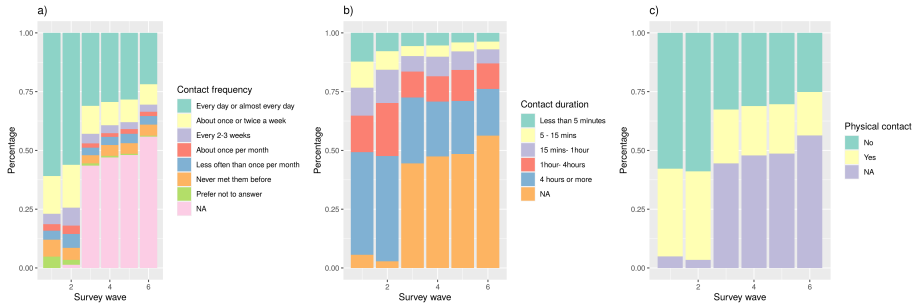

Figure 4: **Contact features.** (a): Contact frequency.(b): Contact duration.(c): Physical contact. From wave 3 onward, a large fraction of contacts are reported in group, missing information on contact frequency, duration and physical contact. .

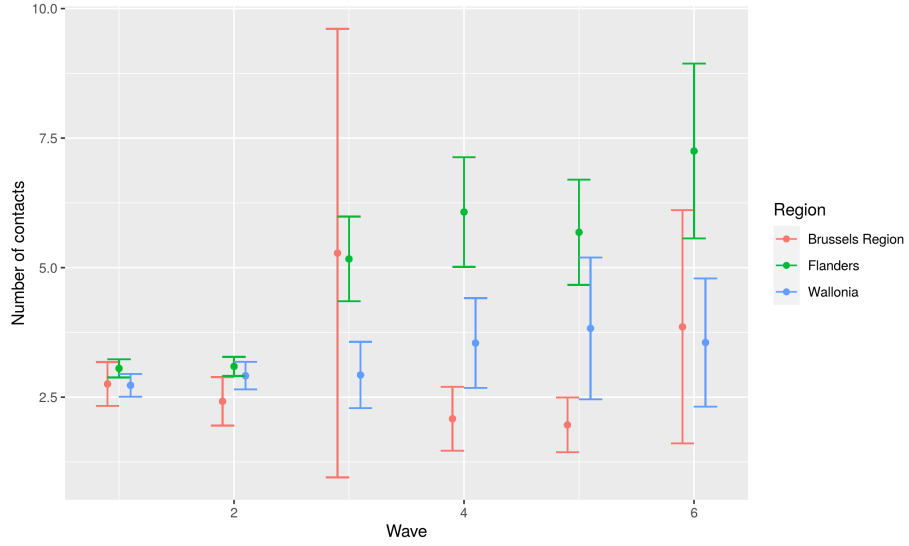

Figure 5: **Average number of contacts broken down by geographical area.** Mean number of contacts broken down by geographical area. Errorbars mark the 95% CI.

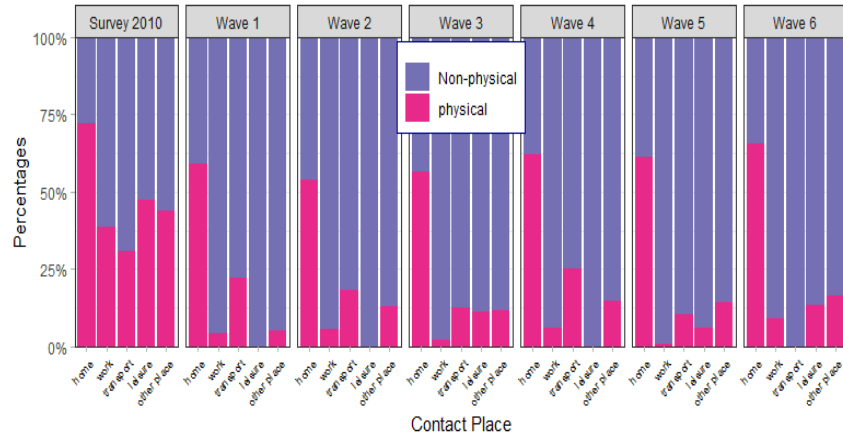

Figure 6: The mean proportion of contacts that involved physical contact by contact place for the 2010 survey in Flanders and the 2020 CoMix surveys (waves 1 to 6) with exception of group contacts

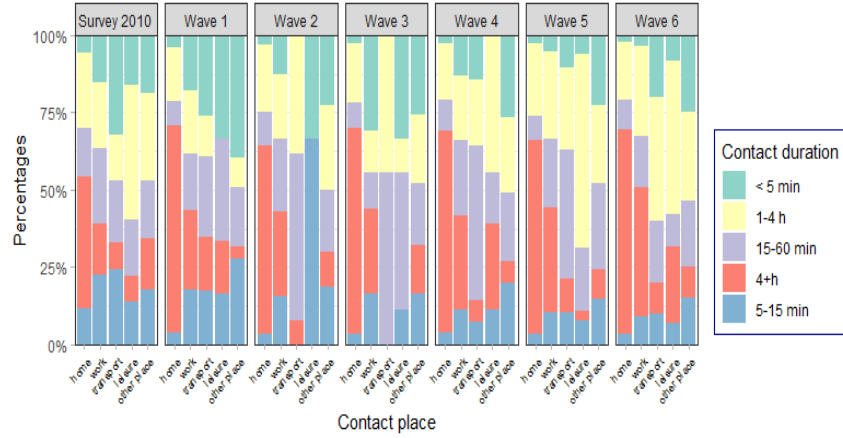

Figure 7: The distribution of all contacts by contact duration and contact place for the 2010 survey in Flanders and the 2020 CoMix surveys (waves 1 to 6) with exception of group contacts

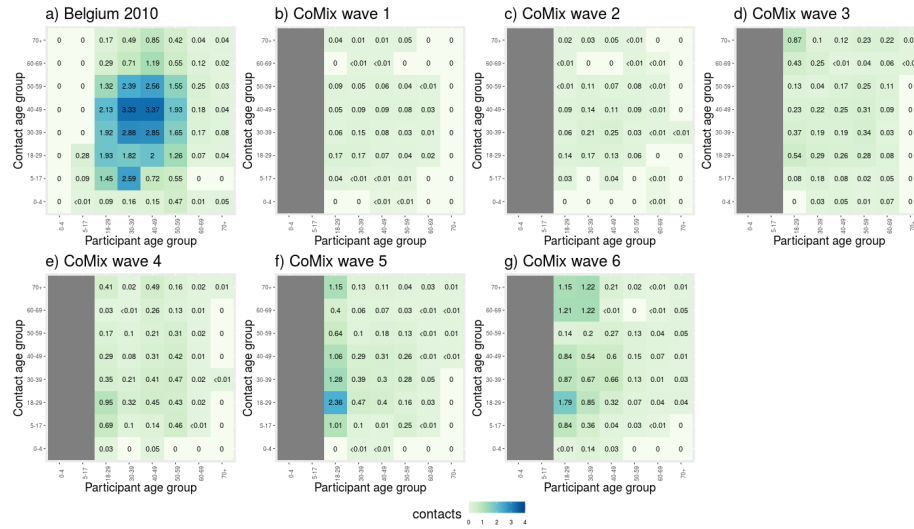

Figure 8: **Social contacts at work.** (a): Average number of daily contacts at work for the 2010 survey. (b-g) Average number of reported contacts at work for the 6 waves of the CoMix survey.

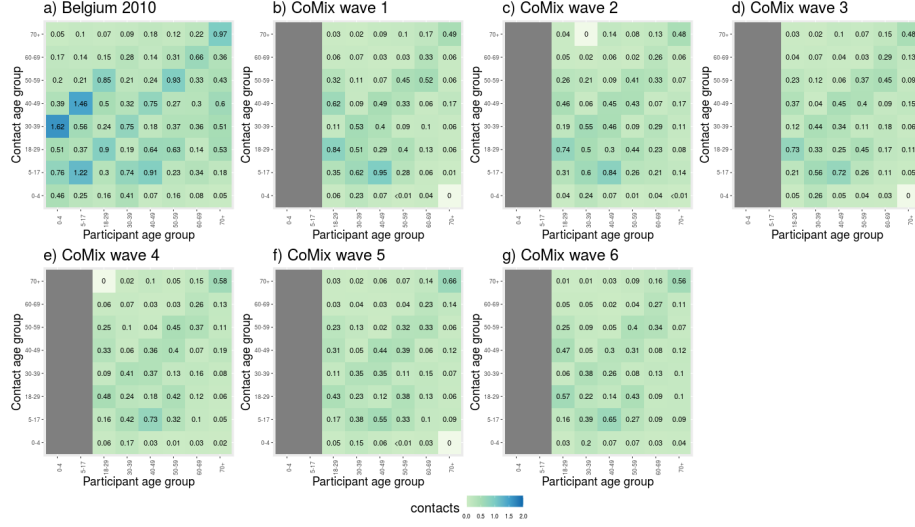

Figure 9: **Social contacts at home.** (a): Average number of daily contacts at home for the 2010 survey. (b-g) Average number of reported contacts at home for the 6 waves of the CoMix survey.

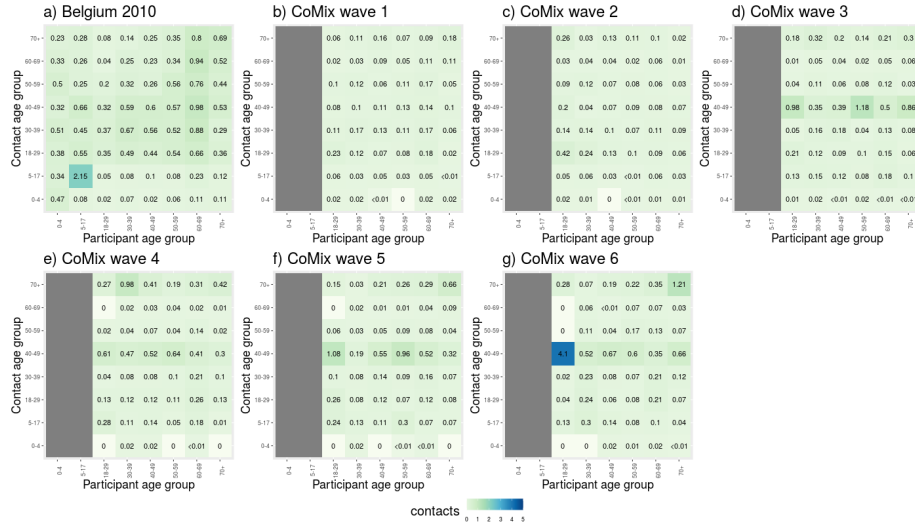

Figure 10: **Social contact "other" locations.** (a): Average number of daily contacts made at "other" locations for the 2010 survey. (b-g) Average number of reported contacts made at "other" locations for the 6 waves of the CoMix survey.

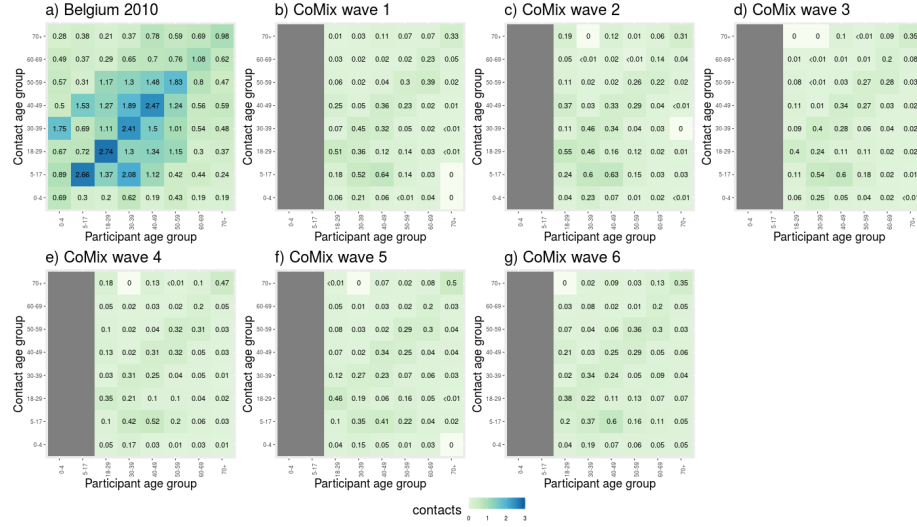

Figure 11: **Physical contacts.** (a): Average number of daily physical contacts for the 2010 survey. (b-g) Average number of reported physical contacts for the 6 waves of the CoMix survey.

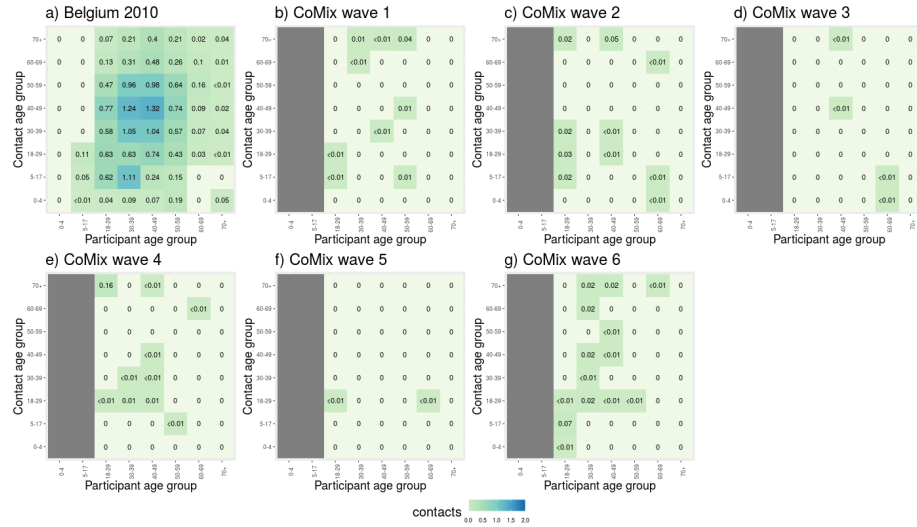

Figure 12: **Physical contacts at work.** (a): Average number of daily physical contacts at work for the 2010 survey. (b-g) Average number of reported physical contacts at work for the 6 waves of the CoMix survey.

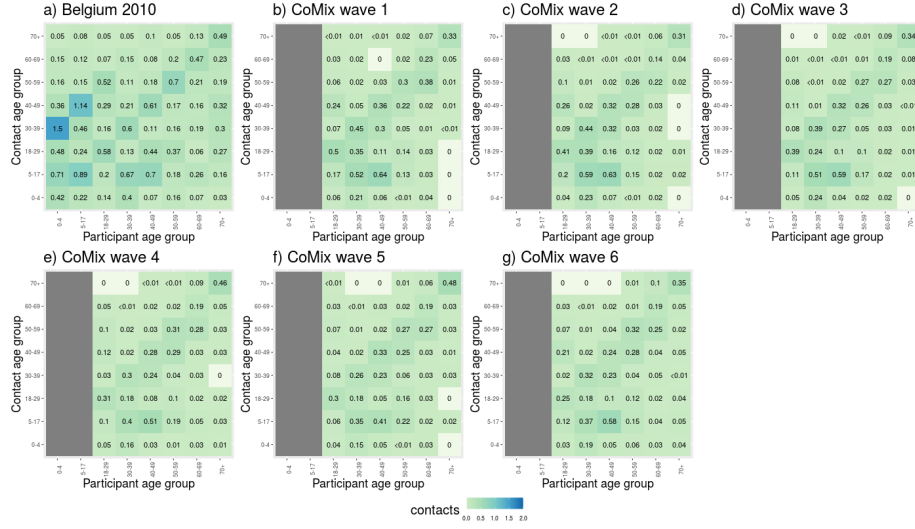

Figure 13: **Physical contacts at home.** (a): Average number of daily physical contacts at home for the 2010 survey. (b-g) Average number of reported physical contacts at home for the 6 waves of the CoMix survey.

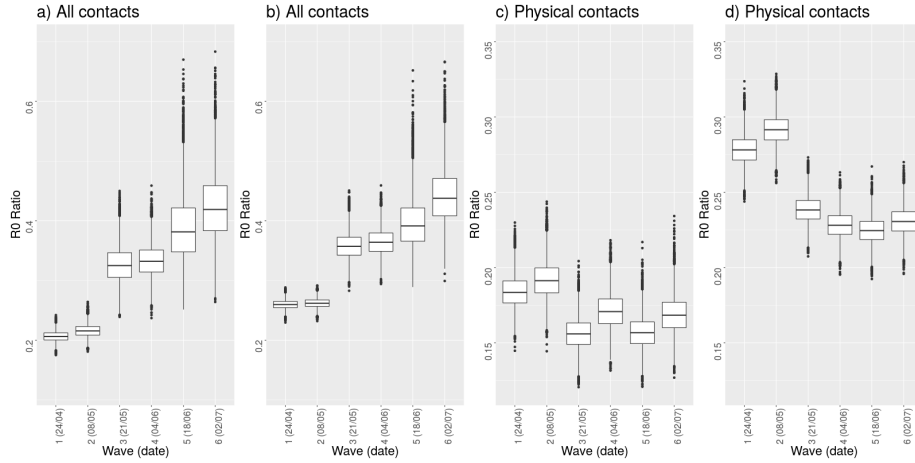

Figure 14:  **$R_0$  ratio.** (a-b):  $R_0$  ratio considering all contacts, without imputation (a) and with imputation (b). (c-d):  $R_0$  ratio considering only physical contacts, without imputation (c) and with imputation (d). The ratio of  $R_0$  is computed with respect to the 2010 survey data. In both panels, the boxplot shows the interquartile range (IQR), The horizontal line marks the median value and the 'x' symbol marks the average. Whiskers extend up to 1.5 times IQR and outliers shown as point.
